# Supplementary material for: Water lettuce (Pistia stratiotes L.) increases biogas effluent pollutant removal efficacy and proves a positive substrate for renewable energy production
Source: PeerJ. 2023 Aug 22;11:e15879. doi: 10.7717/peerj.15879 (PMC10452623; doi:10.7717/peerj.15879)
Supplement: Supplemental Information 1 [file peerj-11-15879-s001.xlsx]

## Sheet: Effluent treatment
Treatments	Time	pH	TSS	BOD	COD	TKN	TP		HADE polluted parameters removal by times
0%	0	7.33	128	86	149	40	14		Note
12.5%	0	7.33	128	86	149	40	14		Time	Days
25%	0	7.33	128	86	149	40	14		TSS	Total suspended solids (mg L-1)
50%	0	7.33	128	86	149	40	14		BOD	Biochemical oxygen demand (mg L-1)
0%	6	7.53	25	48	83	23.5	4.43		COD	Chemcial oxygen demand (mg L-1)
12.5%	6	7.44	20	43	74	23.5	2.8		TKN	Total Kjeldahl nitrogen (mg L-1)
25%	6	7.22	12	42.5	72	21.3	2.76		TP	Total phosphorus (mg L-1)
50%	6	7.08	7	35	60	24.7	2.4
0%	12	7.22	12	41	69	20.3	3.03
12.5%	12	7.46	13	38.2	66	19.7	1.7
25%	12	6.94	7	25.3	44	21	1.81
50%	12	6.76	5	27	48	19.7	1.36
0%	18	7.09	10	40.9	70	19	2.8
12.5%	18	6.39	12	21.5	37.1	18.1	2.16
25%	18	6.85	4	18.8	32.5	17.6	2.29
50%	18	6.95	3	16.7	28.8	17.1	1.64
0%	24	7.02	10	46.3	79.8	18.5	2.84
12.5%	24	6.86	9	22.6	39	16.9	1.6
25%	24	6.81	6	21	36.2	16	1.57
50%	24	6.83	3	18.8	32.5	15.5	1.42
0%	30	7.27	10	41.5	72.4	17.7	2.18
12.5%	30	6.83	8	20.1	34.6	15.3	1.54
25%	30	6.95	4	17.3	29.8	14.5	1.47
50%	30	6.95	3	15	25.5	14	1.46

## Sheet: Effciency
Treatments	Time	TSS	BOD	COD	TKN	TP		Treatment efficiency of HDAE
0%	6	80.47	44.19	44.3	41.25	68.36		Note
12.5%	6	84.38	50	50.34	41.25	80		Time	Days
25%	6	90.63	50.58	51.68	46.75	80.29		TSS	Total suspended solids (%)
50%	6	94.53	59.3	59.73	38.25	82.86		BOD	Biochemical oxygen demand (%)
0%	12	90.63	52.33	53.69	49.25	78.36		COD	Chemcial oxygen demand (%)
12.5%	12	89.84	55.58	55.7	50.75	87.86		TKN	Total Kjeldahl nitrogen (%)
25%	12	94.53	70.58	70.47	47.5	87.07		TP	Total phosphorus (%)
50%	12	96.09	68.6	67.79	50.75	90.29
0%	18	92.19	52.44	53.02	52.5	80
12.5%	18	90.63	75	75.1	54.75	84.57
25%	18	96.88	78.14	78.19	56	83.64
50%	18	97.66	80.58	80.67	57.25	88.29
0%	24	92.19	46.16	46.44	53.75	79.71
12.5%	24	92.97	73.72	73.83	57.75	88.57
25%	24	95.31	75.58	75.7	60	88.79
50%	24	97.66	78.14	78.19	61.25	89.86
0%	30	92.19	51.74	51.41	55.75	84.43
12.5%	30	93.75	76.63	76.78	61.75	89
25%	30	96.88	79.88	80	63.75	89.5
50%	30	97.66	82.56	82.89	65	89.57

## Sheet: Biomass
Treatments	Time (days)	Root length (cm)	Leave length (cm)	Wet weight (gram)
12.5%	0	6.16	4.35	19.2
25%	0	6.52	4.4	39.2
50%	0	6.66	4.35	70.8
12.5%	5	6.32	4.35	34
25%	5	6.76	4.4	64.8
50%	5	6.96	4.35	120.4
12.5%	10	6.88	4.45	53.6
25%	10	7.32	4.4	102.8
50%	10	7.64	4.4	201.2
12.5%	15	6.94	4.45	71.6
25%	15	7.56	4.45	126
50%	15	7.32	4.35	266
12.5%	20	7.5	4.45	84.8
25%	20	7.94	4.45	153.6
50%	20	7.74	4.4	328.8
12.5%	25	7.7	4.45	94
25%	25	7.92	4.45	188.4
50%	25	7.84	4.4	400.8
12.5%	30	8.04	4.45	126
25%	30	8.06	4.45	258.8
50%	30	8.08	4.4	469.6

## Sheet: Biogas
Time	DBP	CBP		Biogas production from PE digester
1	365	365		Note:
2	321	686		Time	Experimental time (days)
3	426	1112		DPB:	Daily biogas production (L)
4	502	1614		CBP:	Cummulative biogas production (L)
5	377	1991
6	506	2497
7	407	2904
8	390	3294
9	226	3520
10	597	4117
11	839	4956
12	521	5477
13	236	5713
14	234	5947
15	347	6294
16	1004	7298
17	731	8029
18	350	8379
19	469	8848
20	1069	9917
21	665	10582
22	449	11031
23	494	11525
24	425	11950
25	726	12676
26	893	13569
27	1278	14847
28	522	15369
29	401	15770
30	1031	16801
31	500	17301
32	1280	18581
33	890	19471
34	716	20187
35	758	20945
36	920	21865
37	1051	22916
38	465	23381
39	502	23883
40	520	24403
41	819	25222
42	634	25856
43	1025	26881
44	522	27403
45	615	28018
46	1039	29057
47	434	29491
48	525	30016
49	617	30633
50	413	31046
51	310	31356
52	377	31733
53	500	32233
54	534	32767
55	436	33203
56	298	33501
57	260	33761
58	310	34071
59	335	34406
60	369	34775

## Sheet: Biogas composition
Time	Composition	Concentration (%)
0	CH4	55.3
0	CO2	30.5
0	Others	14.2
4	CH4	54.1
4	CO2	28.7
4	Others	17.2
8	CH4	54.5
8	CO2	26.8
8	Others	18.7
12	CH4	54.9
12	CO2	31.7
12	Others	13.4
16	CH4	56.5
16	CO2	29.9
16	Others	13.6
20	CH4	56.4
20	CO2	26.4
20	Others	17.2
24	CH4	54.4
24	CO2	27.1
24	Others	18.5
28	CH4	55.9
28	CO2	26.2
28	Others	17.9
32	CH4	56
32	CO2	27.5
32	Others	16.5
36	CH4	54.4
36	CO2	26.7
36	Others	18.9
40	CH4	59.8
40	CO2	21.9
40	Others	18.3
44	CH4	55.3
44	CO2	26.6
44	Others	18.1
48	CH4	59.9
48	CO2	24.8
48	Others	15.3
52	CH4	55.8
52	CO2	26
52	Others	18.2
56	CH4	58.8
56	CO2	25.7
56	Others	15.5
60	CH4	55.3
60	CO2	30.5
60	Others	14.2

## Sheet: Ambient
Time	Temp		Ambient temperature measured during experimental period
1	30.22		Note
2	30.25		Time	days
3	30.67		Temp	Temperature (oC)
4	29.75
5	29.86
6	29.71
7	29.63
8	29.29
9	28.89
10	28.8
11	28.14
12	27.38
13	29.63
14	30
15	30.22
16	30.67
17	28.3
18	29.3
19	29.4
20	29.7
21	30.1
22	29
23	30
24	29.25
25	30.3
26	30.57
27	30.5
28	30.44
29	27.43
30	27.29

## Sheet: Water level
Treatments	Time (days)	Water level		Ambient temperature measured during experimental period
0%	0	21		Note
12.5%	0	21		Time	days
25%	0	21		Temp	Temperature (oC)
50%	0	21		Vater level	cm
0%	5	20
12.5%	5	19.64
25%	5	19.74
50%	5	19.76
0%	10	19.4
12.5%	10	18.6
25%	10	18.82
50%	10	19.12
0%	15	18.63
12.5%	15	17.53
25%	15	18.16
50%	15	18.42
0%	20	18
12.5%	20	16.52
25%	20	17.3
50%	20	17.68
0%	25	17.2
12.5%	25	15.54
25%	25	16.38
50%	25	16.52
0%	30	16.4
12.5%	30	14.54
25%	30	15.54
50%	30	15.52

## Sheet: Correlation
pH	TSS	BOD	COD	TKN	TP	Root length	Leaf length	Fresh biomass
7.33	128	86	149	40	14	6.16	4.35	19.2
7.33	128	86	149	40	14	6.52	4.4	39.2
7.33	128	86	149	40	14	6.66	4.35	70.8
7.33	128	86	149	40	14	6.32	4.35	34
7.53	25	48	83	23.5	4.43	6.76	4.4	64.8
7.44	20	43	74	23.5	2.8	6.96	4.35	120.4
7.22	12	42.5	72	21.3	2.76	6.88	4.45	53.6
7.08	7	35	60	24.7	2.4	7.32	4.4	102.8
7.22	12	41	69	20.3	3.03	7.64	4.4	201.2
7.46	13	38.2	66	19.7	1.7	6.94	4.45	71.6
6.94	7	25.3	44	21	1.81	7.56	4.45	126
6.76	5	27	48	19.7	1.36	7.32	4.35	266
7.09	10	40.9	70	19	2.8	7.5	4.45	84.8
6.39	12	21.5	37.1	18.1	2.16	7.94	4.45	153.6
6.85	4	18.8	32.5	17.6	2.29	7.74	4.4	328.8
6.95	3	16.7	28.8	17.1	1.64	7.7	4.45	94
7.02	10	46.3	79.8	18.5	2.84	7.92	4.45	188.4
6.86	9	22.6	39	16.9	1.6	7.84	4.4	400.8
6.81	6	21	36.2	16	1.57	8.04	4.45	126
6.83	3	18.8	32.5	15.5	1.42	8.06	4.45	258.8
7.27	10	41.5	72.4	17.7	2.18	8.08	4.4	469.6
6.83	8	20.1	34.6	15.3	1.54
6.95	4	17.3	29.8	14.5	1.47
6.95	3	15	25.5	14	1.46
